# Supplementary material
Source: Springer Nature journal article supplement (https://www.springermedizin.de/resource/supplementary/13023_2013_710_MOESM2_ESM.pdf/9642902)

**A**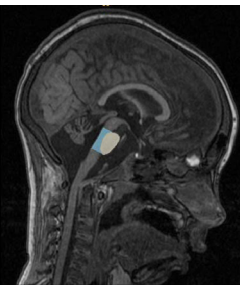

VP  
T  
medulla

**B**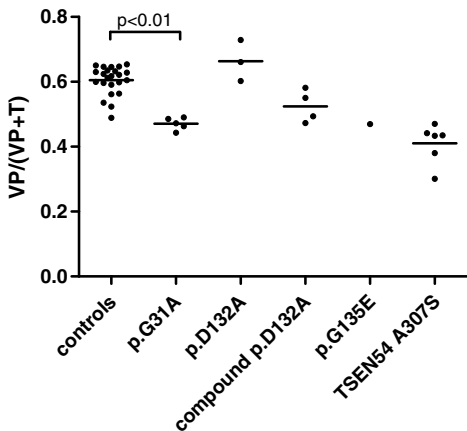**C**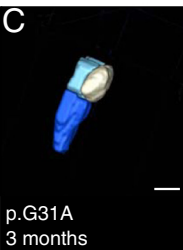**D**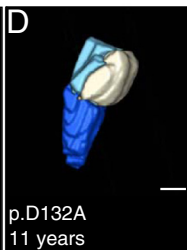**E**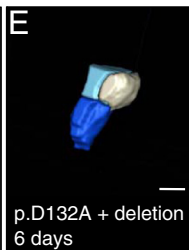**F**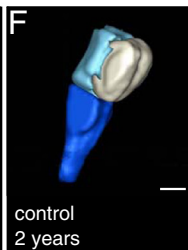

Supplement: MOESM2 [file 9642902]
